# Supplementary material for: Rigidity of lamellar nanosheets
Source: Royal Society of Chemistry journal article supplement (doi:10.1039/c7sm00047b), 2017-01-01
Supplement: c7sm00047b1.pdf [file c7sm00047b1.pdf]

# Supporting Information - Rigidity of Lamellar Nanosheets

*Eid Almutairi, Meshal Alzaid, Abu Md Niamul Taufique, Matthew R. Semler, Erik K. Hobbie\**

North Dakota State University, Fargo, North Dakota 58108

| $n$ | '10 nm'         | '20 nm'         | '40 nm'         |
|-----|-----------------|-----------------|-----------------|
| 1   | (14.6 ± 0.6) nm | (20.5 ± 1.0) nm | (40.3 ± 2.0) nm |
| 2   | (10 ± 0.5) nm   | (20.6 ± 0.8) nm | (42.3 ± 1.0) nm |
| 3   | (11 ± 0.6) nm   | (18.4 ± 1.0) nm | (40 ± 2.0) nm   |
| 4   | (10.4 ± 0.5) nm | (18.7 ± 0.8) nm | (41.6 ± 1.0) nm |
| 5   | (14.4 ± 0.6) nm | (19.8 ± 1.0) nm | (41.3 ± 2.0) nm |
| 6   | (11 ± 0.5) nm   | (21.5 ± 0.8) nm | (40.8 ± 1.0) nm |

**Table S1:** The measured film thickness and the associated experimental uncertainty for each individual layer. Odd numbered layers are SWCNT ( $n = 1, 3, 5$ ) and even numbered layers are PS ( $n = 2, 4, 6$ ).

**Video S1:** Video of a freestanding SWCNT film (78 nm thickness) being handled with a pipette in a solvent of ethanol.
